# Supplementary material for: National Trends in Suicide Among Asian American or Pacific Islander Youth
Source: PubMed Central journal article supplement (PMC11273234; doi:10.1001/jamanetworkopen.2024.22744), 2024-07-25
Supplement: jamanetwopen-e2422744-s001.pdf [file jamanetwopen-e2422744-s001.pdf]

## **Data Sharing Statement**

### **Data**

**Data available:** No

### **Additional Information**

**Explanation for why data not available:** Data may be shared upon request. The current study used publicly available data from the National Center for Health Statistics final multiple cause-of-death files through WISQARS. (Web-based Injury Statistics Query and Reporting System).
